# Supplementary material for: Glucose-6-Phosphate Dehydrogenase Deficiency Activates Endothelial Cell and Leukocyte Adhesion Mediated via the TGFβ/NADPH Oxidases/ROS Signaling Pathway
Source: MDPI journal article supplement (doi:10.3390/ijms21207474), 2020-10-10
Supplement: s1 [file s1]

### **Supporting information**

Glucose-6-phosphate dehydrogenase deficiency activates endothelial cell and leukocyte adhesion mediated via the TGF $\beta$ /NADPH oxidases/ROS signaling pathway.

Rajesh Parsanathan and Sushil K. Jain\*

Department of Pediatrics and Center for Cardiovascular Diseases and Sciences, Louisiana State University Health Sciences Center-Shreveport, 1501 Kings Highway, Shreveport, Louisiana 71130, USA

**Supplementary Table S1.** List of FAM-labeled TaqMan® primer/probe sets used for quantitative RT-PCR analysis.

| Gene symbol       | Gene Name                                   | Assay ID      |
|-------------------|---------------------------------------------|---------------|
| G6PD              | glucose-6-phosphate dehydrogenase           | Hs00166169_m1 |
| TGF- $\beta$ 1    | Transforming growth factor-beta1            | Hs00998133_m1 |
| TGF- $\beta$ 1 R1 | Transforming growth factor-beta1 receptor 1 | Hs00610320_m1 |
| TGF- $\beta$ 1 R2 | Transforming growth factor-beta1 receptor 2 | Hs00234253_m1 |
| NOX2              | NADPH oxidase 2                             | Hs00166163_m1 |
| NOX4              | NADPH oxidase 4                             | Hs01379108_m1 |
| GAPDH             | glyceraldehyde-3-phosphate dehydrogenase    | Hs02786624_g1 |

**Supplementary Table S2.** List of antibodies and dilutions used for Western blot analysis.

| Antibody designation | Type              | Antibody dilution and incubation time | Molecular weight (kDa) | Supplier (Catalog #) |
|----------------------|-------------------|---------------------------------------|------------------------|----------------------|
| G6PD                 | Rabbit Polyclonal | 1:1000, 4° C overnight                | ~ 60                   | Abcam (ab993)        |

|                                            |                           |                        |       |                        |
|--------------------------------------------|---------------------------|------------------------|-------|------------------------|
| TGF- $\beta$ 1                             | Mouse Monoclonal          | 1:400, 4° C overnight  | ~ 25  | Santa Cruz (sc-52893)  |
| TGF- $\beta$ 1 R1                          | Mouse Monoclonal          | 1:400, 4° C overnight  | ~ 53  | Santa Cruz (sc-518018) |
| TGF- $\beta$ 1 R2                          | Mouse Monoclonal          | 1:400, 4° C overnight  | ~ 67  | Santa Cruz (sc-17792)  |
| NOX1                                       | Mouse Monoclonal          | 1:400, 4° C overnight  | ~ 59  | Santa Cruz (sc-518023) |
| NOX2<br>/gp91phox                          | Rabbit Polyclonal         | 1:1000, 4° C overnight | ~ 60  | Abcam (ab31092)        |
| NOX4                                       | Rabbit Monoclonal         | 1:1000, 4° C overnight | ~ 63  | Abcam (ab109225)       |
| ICAM-1                                     | Mouse Monoclonal          | 1:1000, 4° C overnight | ~ 95  | Abcam (ab2213)         |
| VCAM-1                                     | Mouse Monoclonal          | 1:400, 4° C overnight  | ~ 110 | Santa Cruz (sc-20070)  |
| MCP-1                                      | Rabbit Polyclonal         | 1:1000, 4° C overnight | ~ 11  | Abcam (ab9779)         |
| TNF- $\alpha$                              | Mouse Monoclonal          | 1:1000, 4° C overnight | ~ 25  | Abcam (ab1793)         |
| $\beta$ -actin                             | Mouse Monoclonal -<br>HRP | 1:25000, 2 h RT        | ~ 42  | Abcam (ab49900)        |
| Goat anti-Rabbit-HRP Secondary<br>Antibody |                           | 1:4000, 2 h RT         | NA    | Millipore (12-348)     |
| Goat anti-Mouse-HRP Secondary<br>Antibody  |                           | 1:4000, 2 h RT         | NA    | Bio-Rad (170-6516)     |

**Figure S1.**

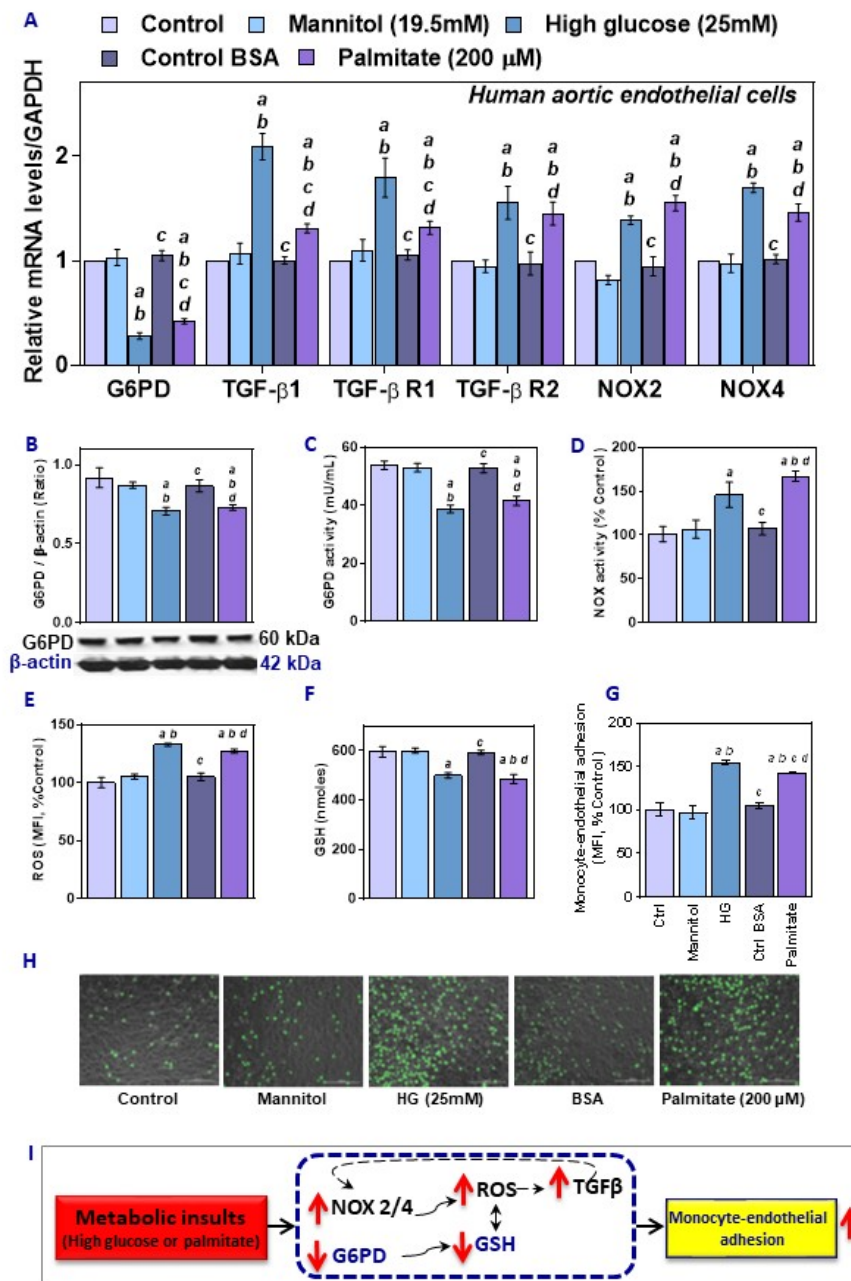

**Figure S1.** The effect of metabolic insults created by treatment with high glucose (HG; 25 mM) or palmitate (200  $\mu$ M) on G6PD, TGF- $\beta$ 1, TGF- $\beta$ 1 receptors, and NADPH oxidases (NOX) in human aortic endothelial cells (HAEC) and monocyte-endothelial cell adhesion. A, RT-qPCR performed to assess the level of target genes as indicated. B and C, G6PD protein levels by Western blot and G6PD enzyme activity. D, NADPH oxidase activity. E, ROS and F, GSH content. G and H, Phase-contrast images of HAEC and SC monocytic cells (scale bar: 200  $\mu$ m). I, Schematic showing that metabolic insults such as treatment with high glucose or palmitate mitigate G6PD, increase oxidative stress, and favor monocyte-endothelial cell adhesion. Results are mean  $\pm$  SEM (n=3-6). Significance at  $p < 0.05$ : a, compared with control; b, compared with mannitol; c, compared with high glucose; d, compared with control BSA.

**Figure S2.**

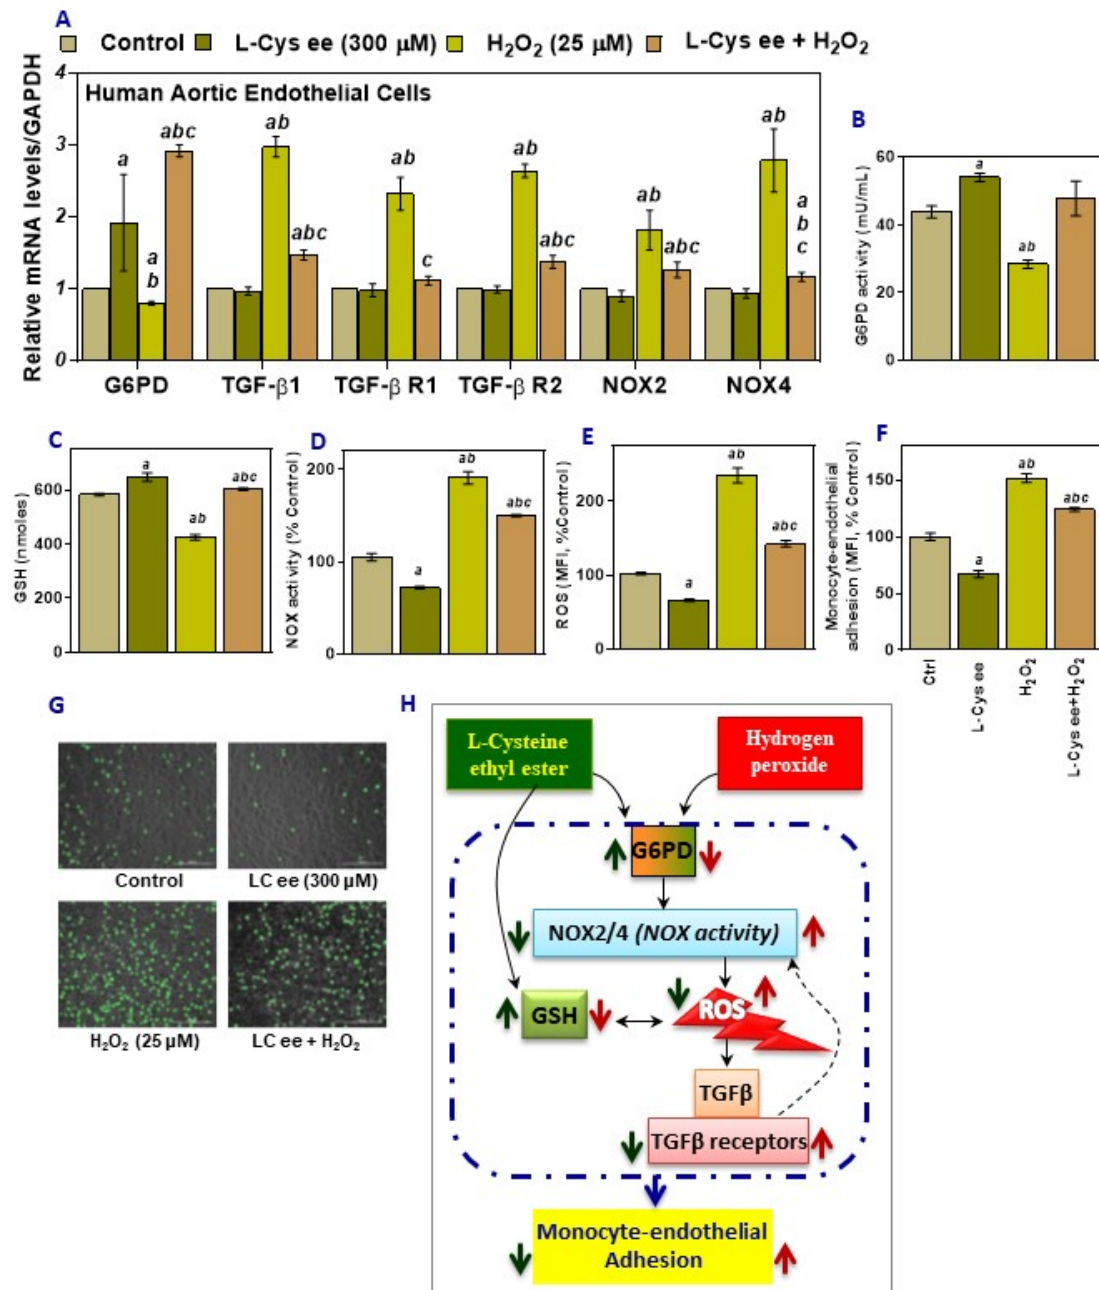

**Figure S2.** The effect of L-cysteine ethyl ester (LC ee) on TGF-β/NOX in H<sub>2</sub>O<sub>2</sub>-treated HAEC and monocyte-endothelial cell adhesion. A, RT-qPCR performed to assess the level of target genes as indicated. B, G6PD activity and C, NADPH oxidase activity. D, GSH content and E, ROS. F and G, Phase-contrast images of HAEC and SC monocyte cells (scale bar: 200 μm). H, Schematic showing the positive effect of supplementation with cell-permeable cysteine over peroxide-induced oxidative stress and monocyte-endothelial cell adhesion. Results are mean ± SEM (n=3-6). Significance at  $p < 0.05$ : a, compared with control; b, compared with L-cysteine ethyl ester; c, compared with hydrogen peroxide.
